# Supplementary material for: Rab14 specifies the apical membrane through Arf6-mediated regulation of lipid domains and Cdc42
Source: PubMed Central journal article supplement (PMC5128791; doi:10.1038/srep38249), 2016-11-30
Supplement: srep38249-s1.pdf [file srep38249-s1.pdf]

# Supplemental Figure 1

**A**

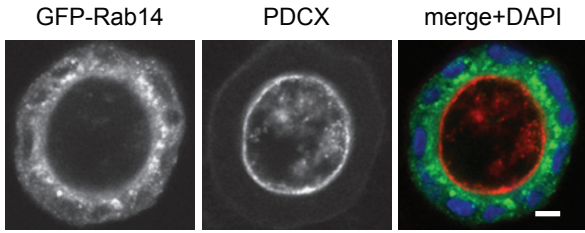

**B**

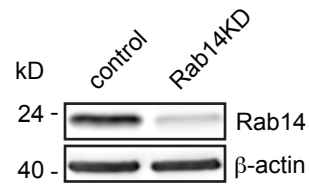

**C**

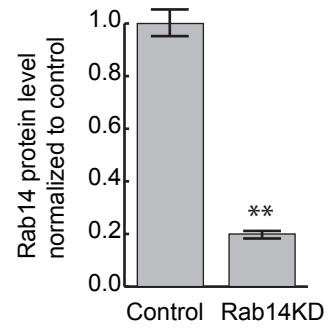

**D**

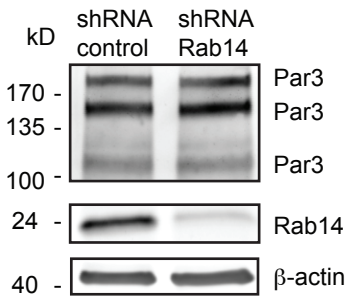

**E**

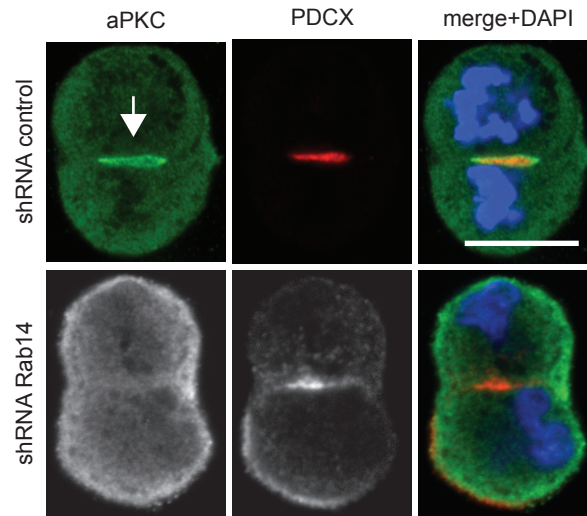

**F**

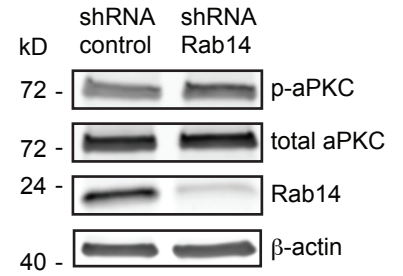

# Supplemental Figure 2

**A**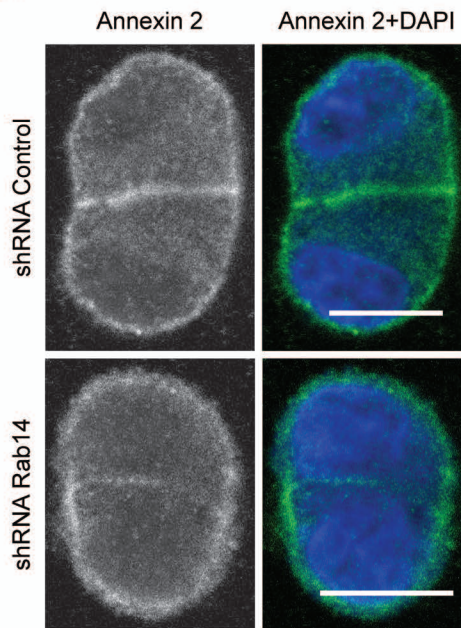**B**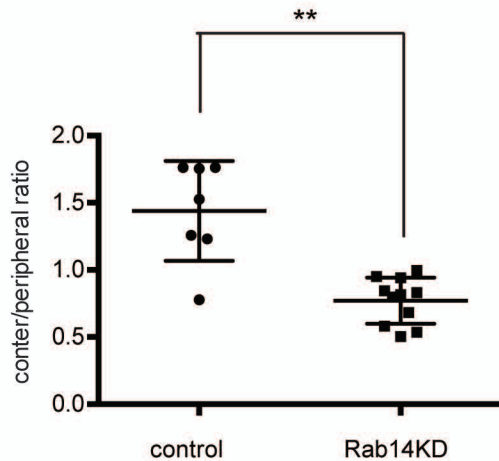

# Supplemental Figure 3

**A.**

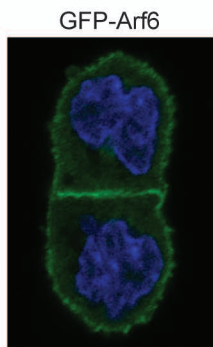

**B.**

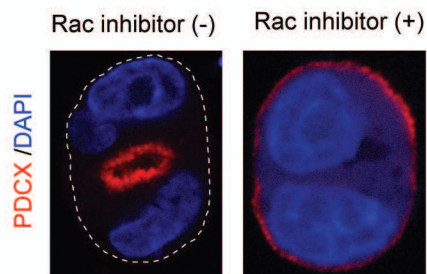

**C.**

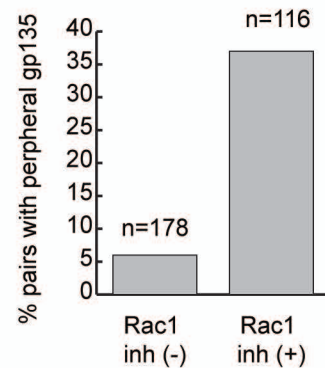

**D.**

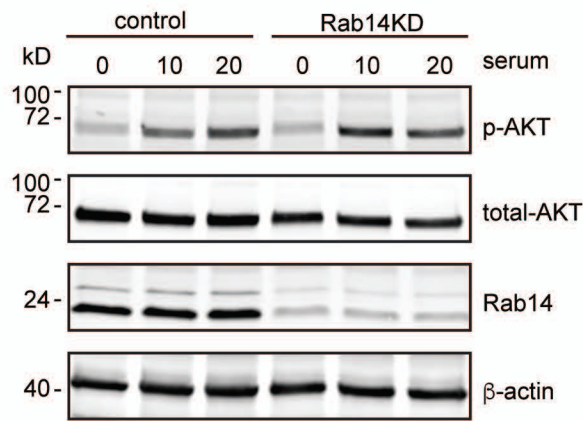

# Supplemental Figure 4

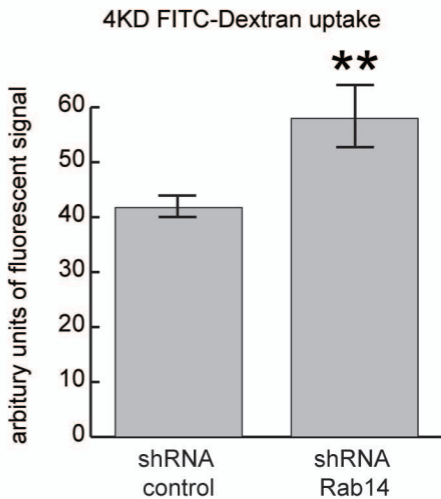

## **Rab14 specifies the apical membrane through Arf6-mediated regulation of lipid domains and Cdc42**

Lu and Wilson

**Supplemental Figure 1.** **A.** Rab14 localizes to apical vesicles in mature cysts. Cells were transfected with GFP-Rab14 and fixed and labeled for podocalyxin (red) 4 days after plating. GFP-Rab14 localizes to tubulovesicular membranes adjacent to apical membrane. **B., C.** Rab14 protein level is reduced by Rab14 specific shRNA. Stable cell lines were infected with shRNA lentivirus against Rab14. Rab14 expression is decreased by more than 80%. **D.** Par-3 protein levels do not change after Rab14 KD. Rab14 KD results in displacement of aPKC from the forming AMIS. **F.** There is no change in aPKC levels after Rab14 KD. Scale bars, 10  $\mu$ m. DAPI, nuclei (blue).

**Supplemental Figure 2.** **A.** Rab14 KD results in mis-localization of endogenous Anx2. **B.** Quantification of Anx2 distribution after Rab14 KD. Scale bars, 10  $\mu$ m. \*\*,  $p < 0.002$ .

**Supplemental Figure 3.** **A.** Arf6-GFP localizes to cell:cell contacts. **B.** Incubation with Rac1 inhibitor inhibits transport of podocalyxin from the periphery to the AMIS. **C.** Quantification of effects of the Rac1 inhibitor on podocalyxin trafficking. **D.** Rab14 KD increases AKT phosphorylation. Cells were serum starved overnight and 20% serum was added. Cells were lysed 0, 10 or 20 minutes after the replacement of serum. Phospho-AKT was analyzed by Western Blot. There is increased P-AKT in Rab14 KD cells 10 minutes after stimulation. The figure is representative of 3 independent experiments.

**Supplemental Figure 4.** Rab14 KD increases fluid phase endocytosis. Cells were

incubated with 4KD FITC-dextran for 20 min at 37°C followed by lysis and quantification by fluorimetry. \*\*,  $p < 0.001$  .
